# Supplementary material for: Synthesis of jet fuel range high-density polycycloalkanes with vanillin and cyclohexanone
Source: Royal Society of Chemistry journal article supplement (doi:10.1039/d1se01732b), 2022-01-01
Supplement: d1se01732b1.pdf [file d1se01732b1.pdf]

Supporting Information

**Synthesis of jet fuel range high-density polycycloalkanes with vanillin  
and cyclohexanone**

Haofei Gao,<sup>a,b</sup> Fengan Han,<sup>b</sup> Guangyi Li,<sup>b</sup> Aiqin Wang,<sup>b,c</sup> Yu Cong,<sup>b</sup> Zhizhou Li,<sup>\*a</sup> Wei Wang<sup>\*a</sup> and  
Ning Li<sup>\*b,d</sup>

<sup>a</sup> Shaanxi Key Laboratory of Catalysis, School of Chemistry and Environment Science, Shaanxi University of Technology, Hanzhong 723001, China.

<sup>b</sup> CAS Key Laboratory of Science and Technology on Applied Catalysis, Dalian Institute of Chemical Physics, Chinese Academy of Sciences, Dalian 116023, China.

<sup>c</sup> State Key Laboratory of Catalysis, Dalian Institute of Chemical Physics, Chinese Academy of Sciences, Dalian 116023, China.

<sup>d</sup> Dalian National Laboratory for Clean Energy, Dalian 116023, China.

Correspondence and requests for materials should be addressed to N. L. (E-mail: [lining@dicp.ac.cn](mailto:lining@dicp.ac.cn))

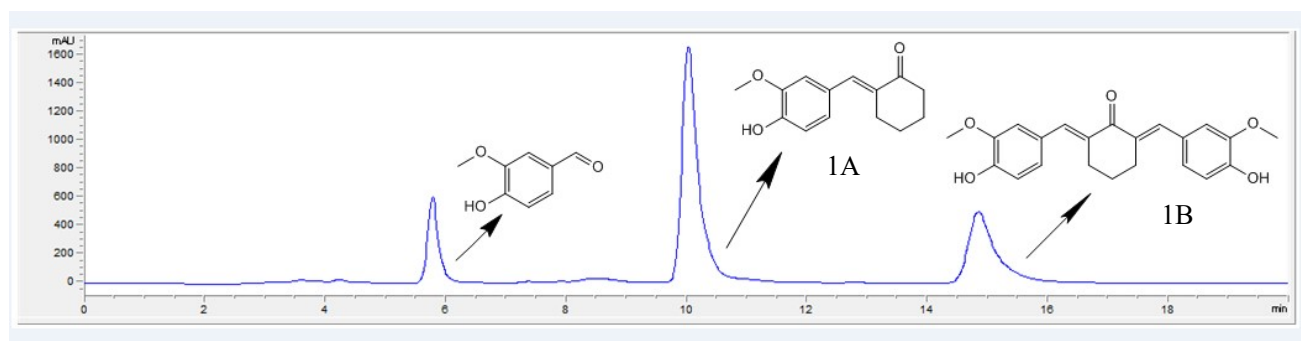

**Figure S1.** High performance liquid chromatography (HPLC) of the products from the aldol condensation of vanillin and cyclohexanone. Reaction conditions: 423 K, 4 h; 5 mmol vanillin, 15 mmol cyclohexanone and 0.05 g STNF were used in the test.

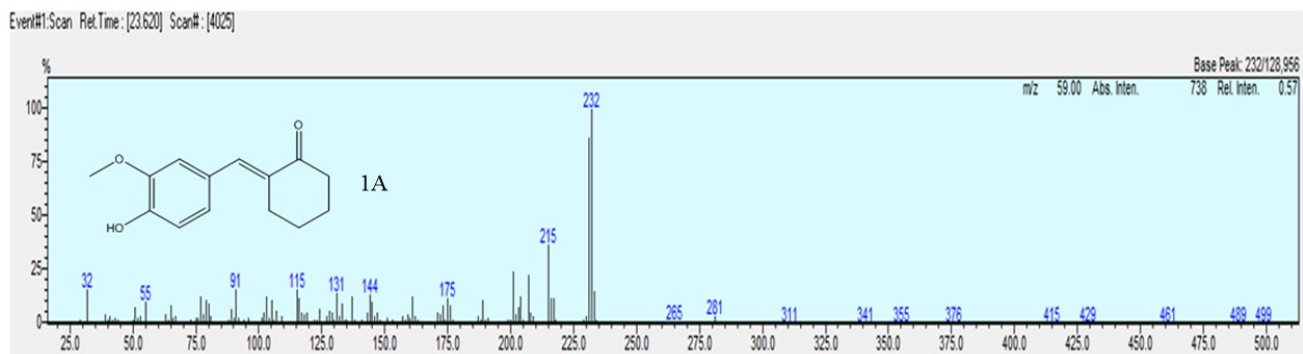

**Figure S2.** Mass spectrogram of **1A** from the aldol condensation of vanillin and cyclohexanone.

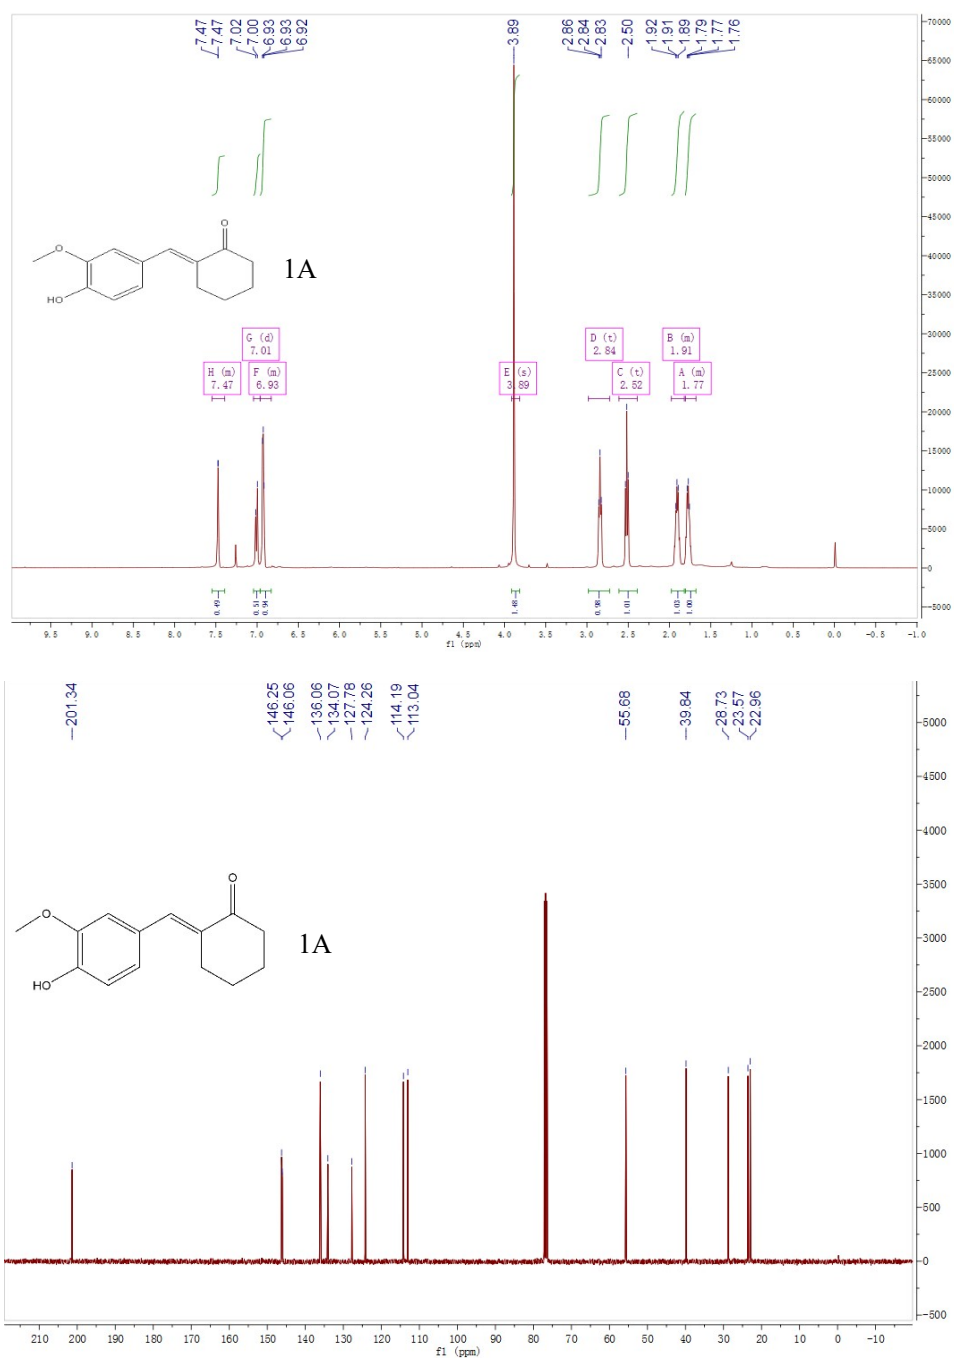

**Figure S3.**  $^1\text{H}$ -NMR and  $^{13}\text{C}$ -NMR spectra of the **1A** from the aldol condensation of vanillin and cyclohexanone.

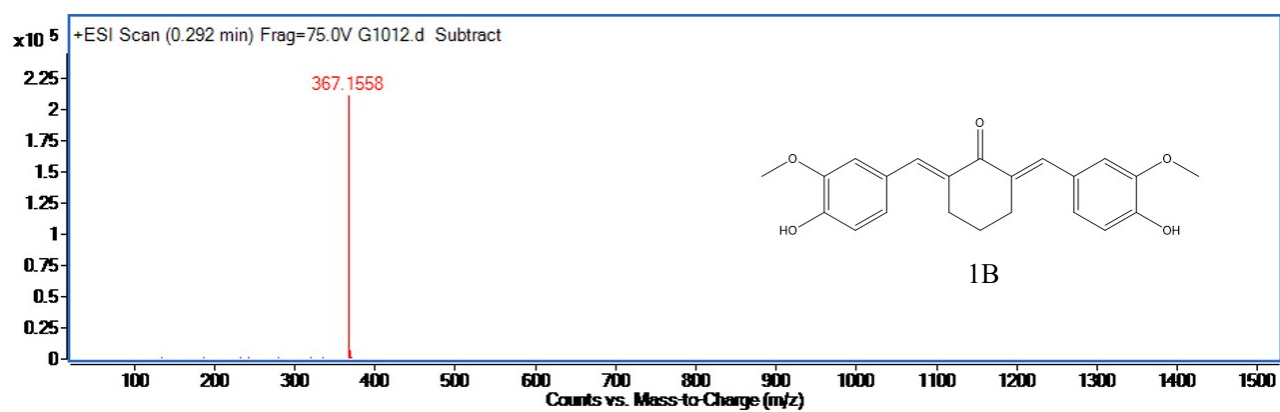

Figure S4. Mass spectrogram of **1B** from the aldol condensation of vanillin and cyclohexanone.

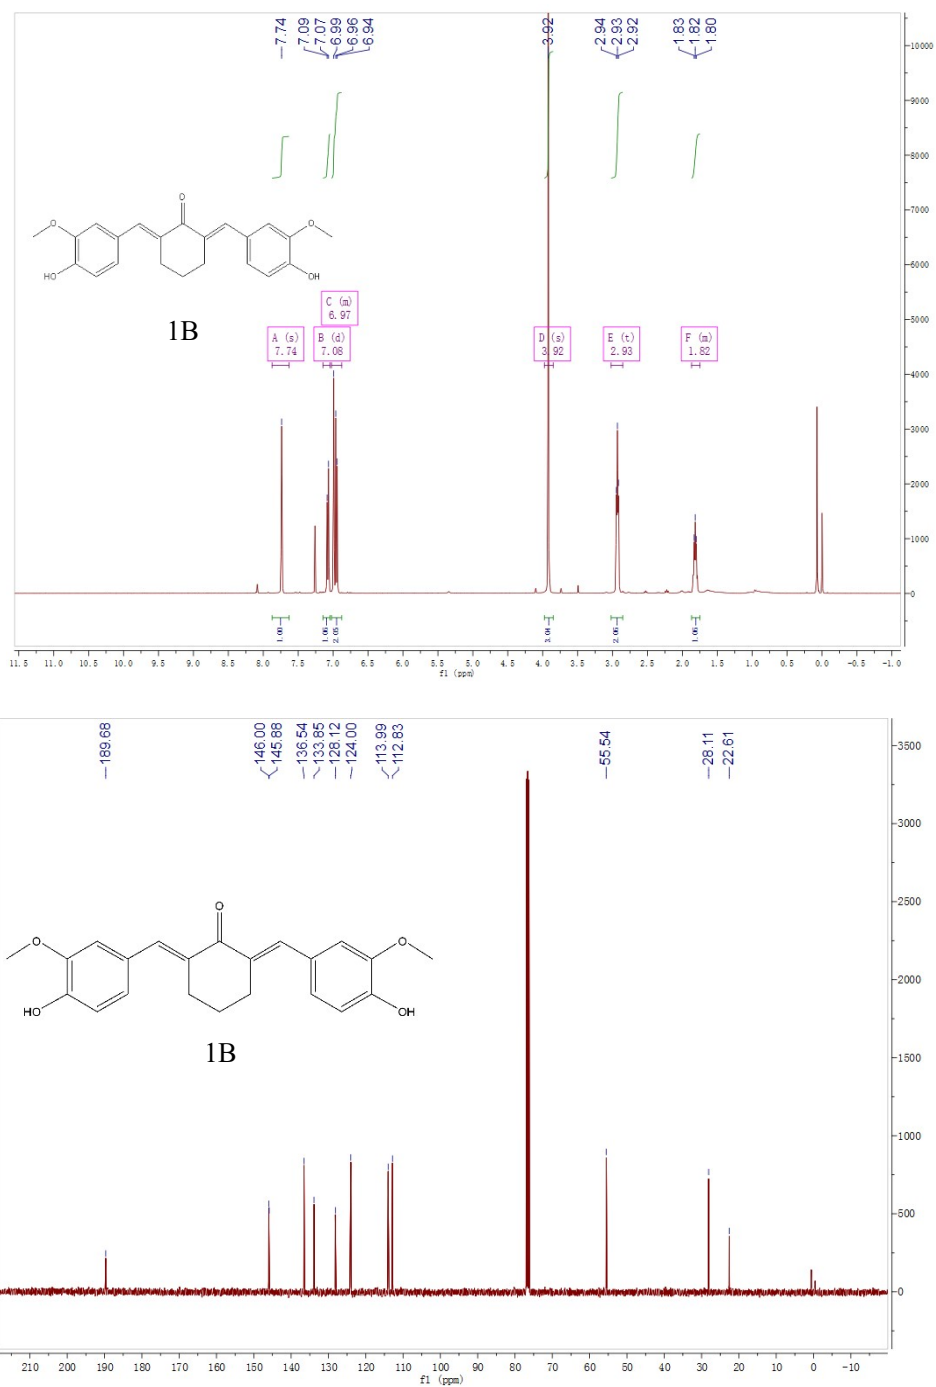

**Figure S5.** <sup>1</sup>H-NMR and <sup>13</sup>C-NMR spectra of the **1B** from aldol condensation of vanillin and cyclohexanone.

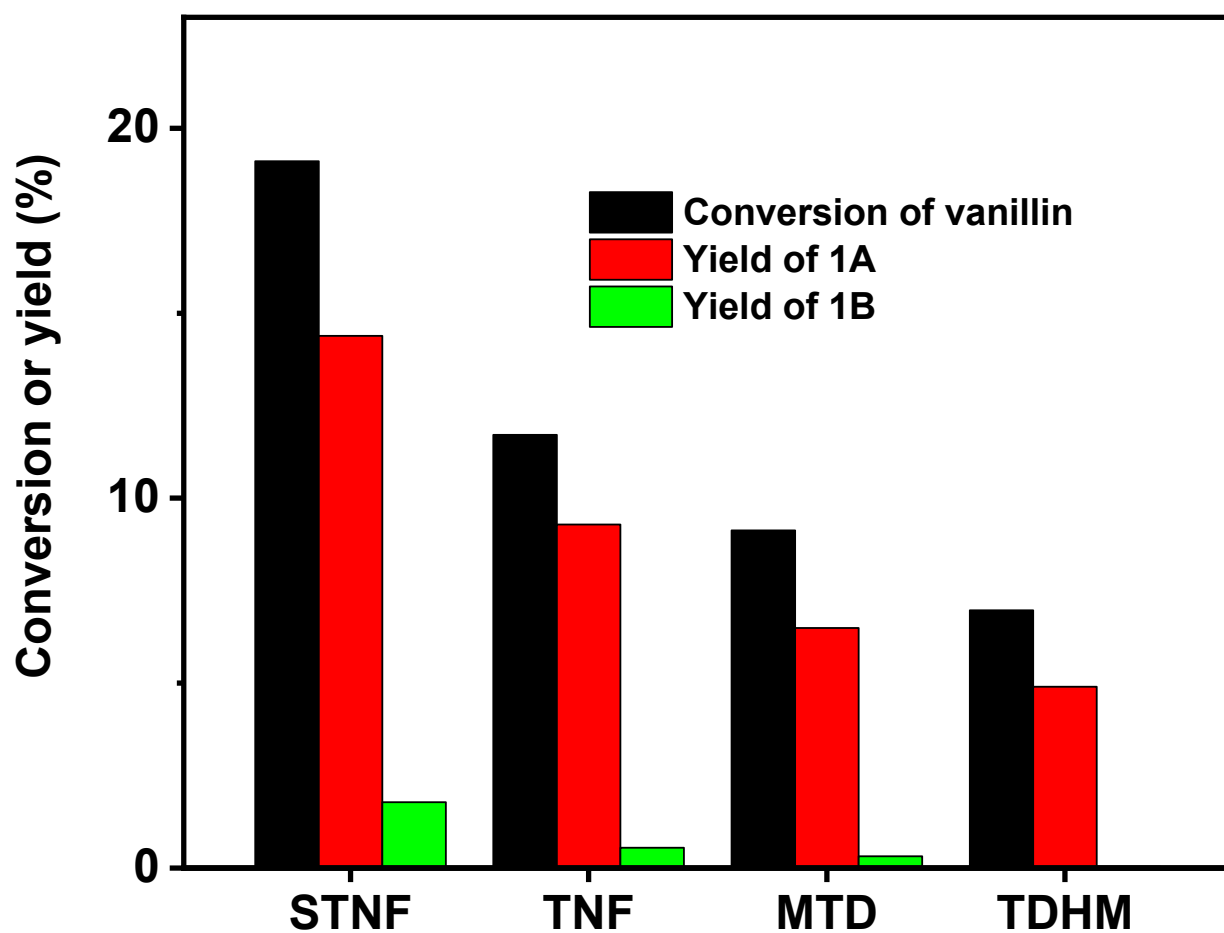

**Figure S6.** Conversion of vanillin and the yields of **1A** and **1B** over the titanium dioxide based nanometer material catalysts. Reaction conditions: 373 K, 4 h; 5 mmol vanillin, 5 mmol cyclohexanone and 0.025 g catalyst were used for each test.

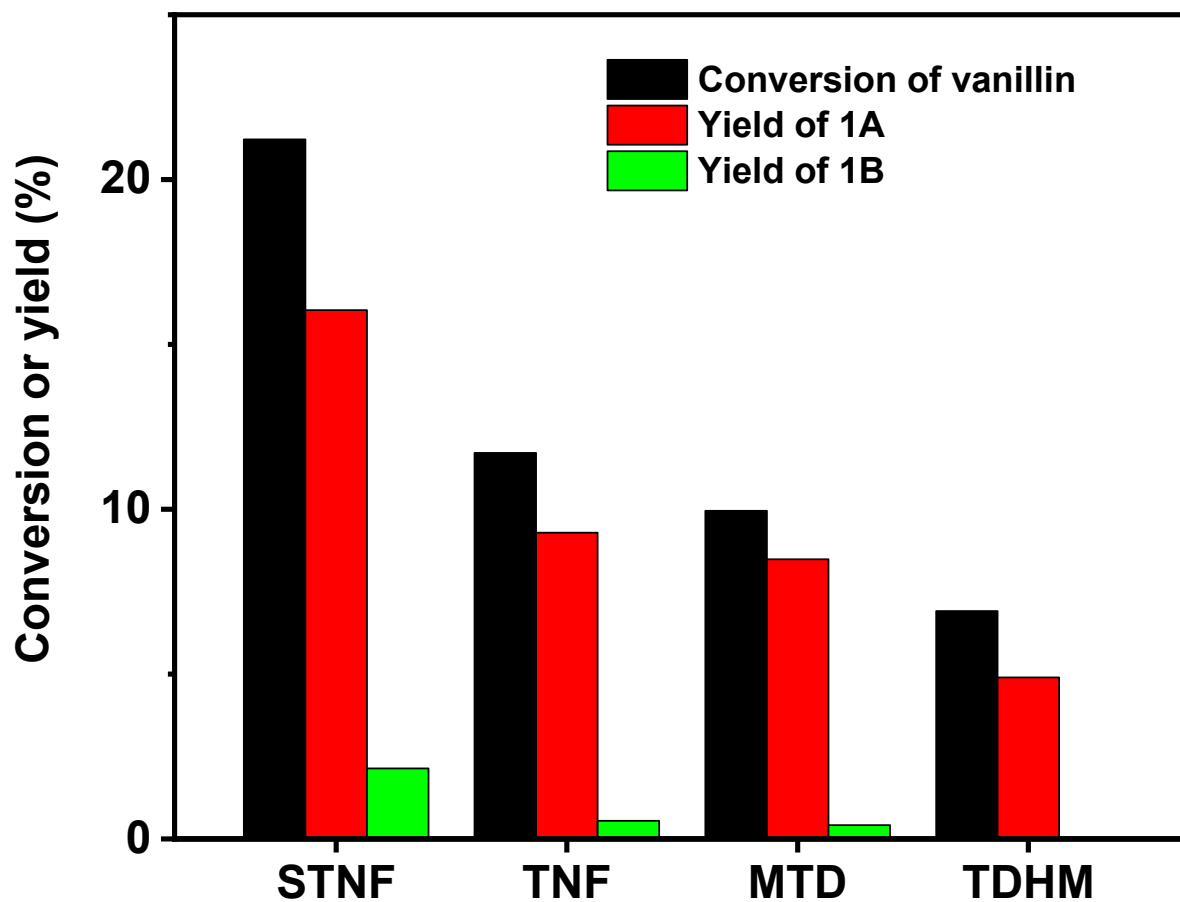

**Figure S7.** Conversion of vanillin and the yields of **1A** and **1B** over the titanium dioxide based nanometer material catalysts. Reaction conditions: 373 K, 4 h; 5 mmol vanillin, 5 mmol cyclohexanone were used in each tests. The surface areas of catalysts were fixed as 8.8 m<sup>2</sup> by controlling the masses of catalysts (0.032 g STNF, 0.025 g TNF, 0.049 g MTD, 0.025 g TDHM) according to their specific BET surface areas measured by N<sub>2</sub>-physorption.



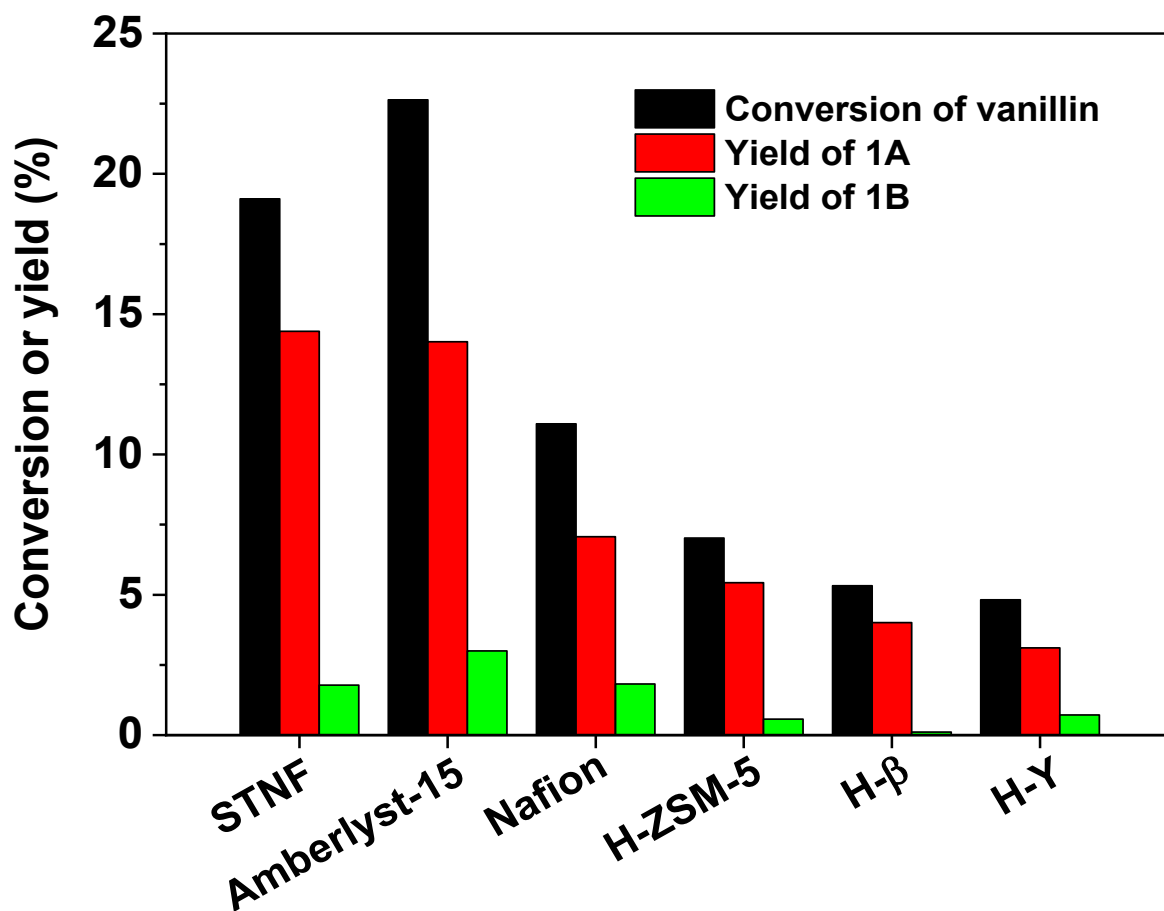

**Figure S8.** Conversion of vanillin and the yields of **1A** and **1B** over STNF and some commercial acid catalysts. Reaction conditions: 373 K, 4 h; 5 mmol vanillin, 5 mmol cyclohexanone, 0.025 g catalysts were used for each test.

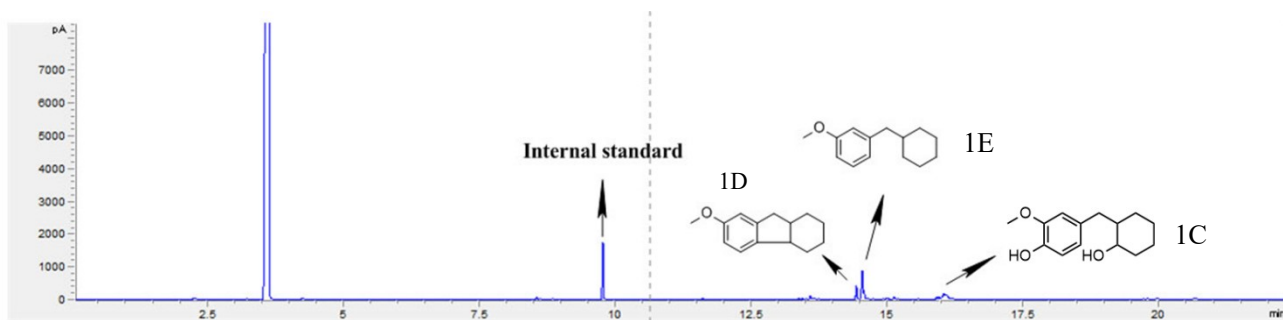

**Figure S9.** Gas chromatography of the product from the HDO of **1A** over the Pt/C catalyst. Reaction conditions: 443 K, 4 MPa H<sub>2</sub>, 4 h; 5 mmol **1A** and 0.1 g Pt/C were used in the test.

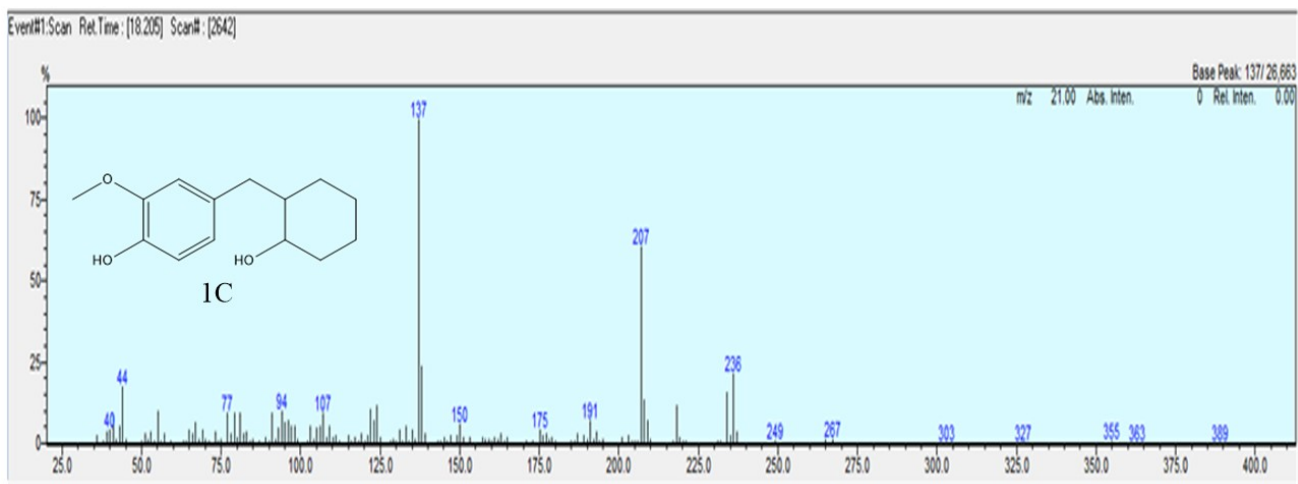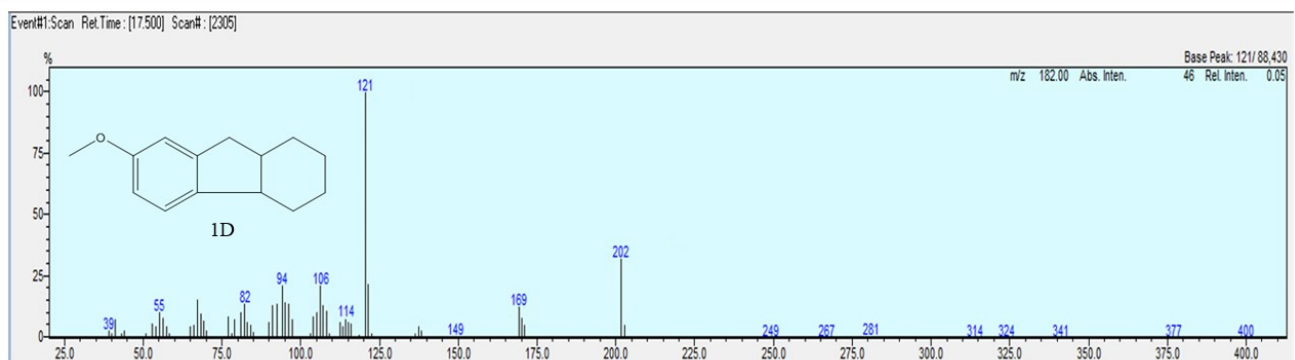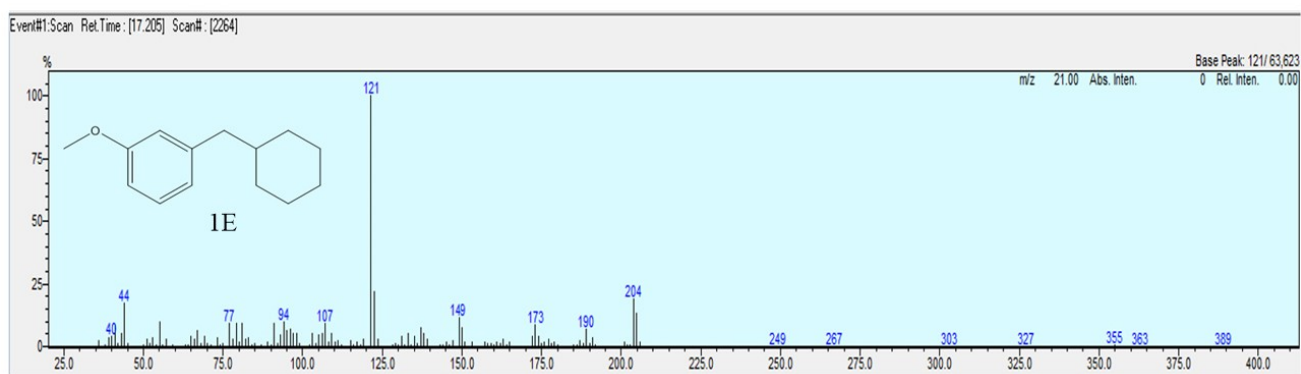

**Figure S10.** Mass spectrograms of **1C**, **1D** and **1E** from the HDO of **1A**.

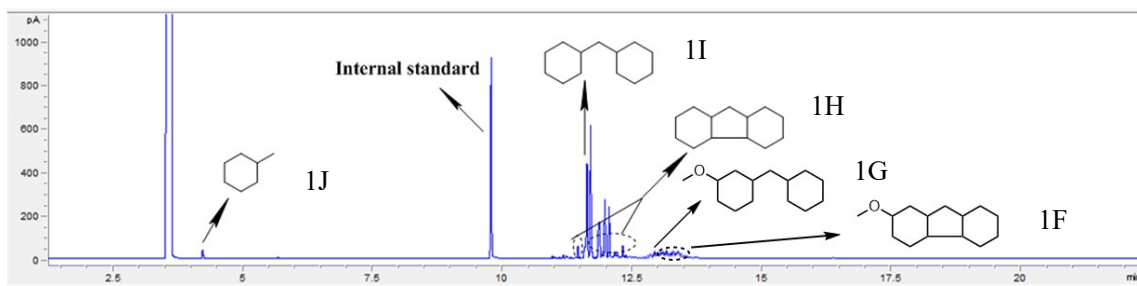

**Figure S11.** Gas chromatography of the product from the HDO of **1A**. Reaction conditions: 473 K, 6 MPa H<sub>2</sub>, 4 h; 5 mmol vanillin, 0.1 g Pd/C and 1 g H-Y were used in the test.

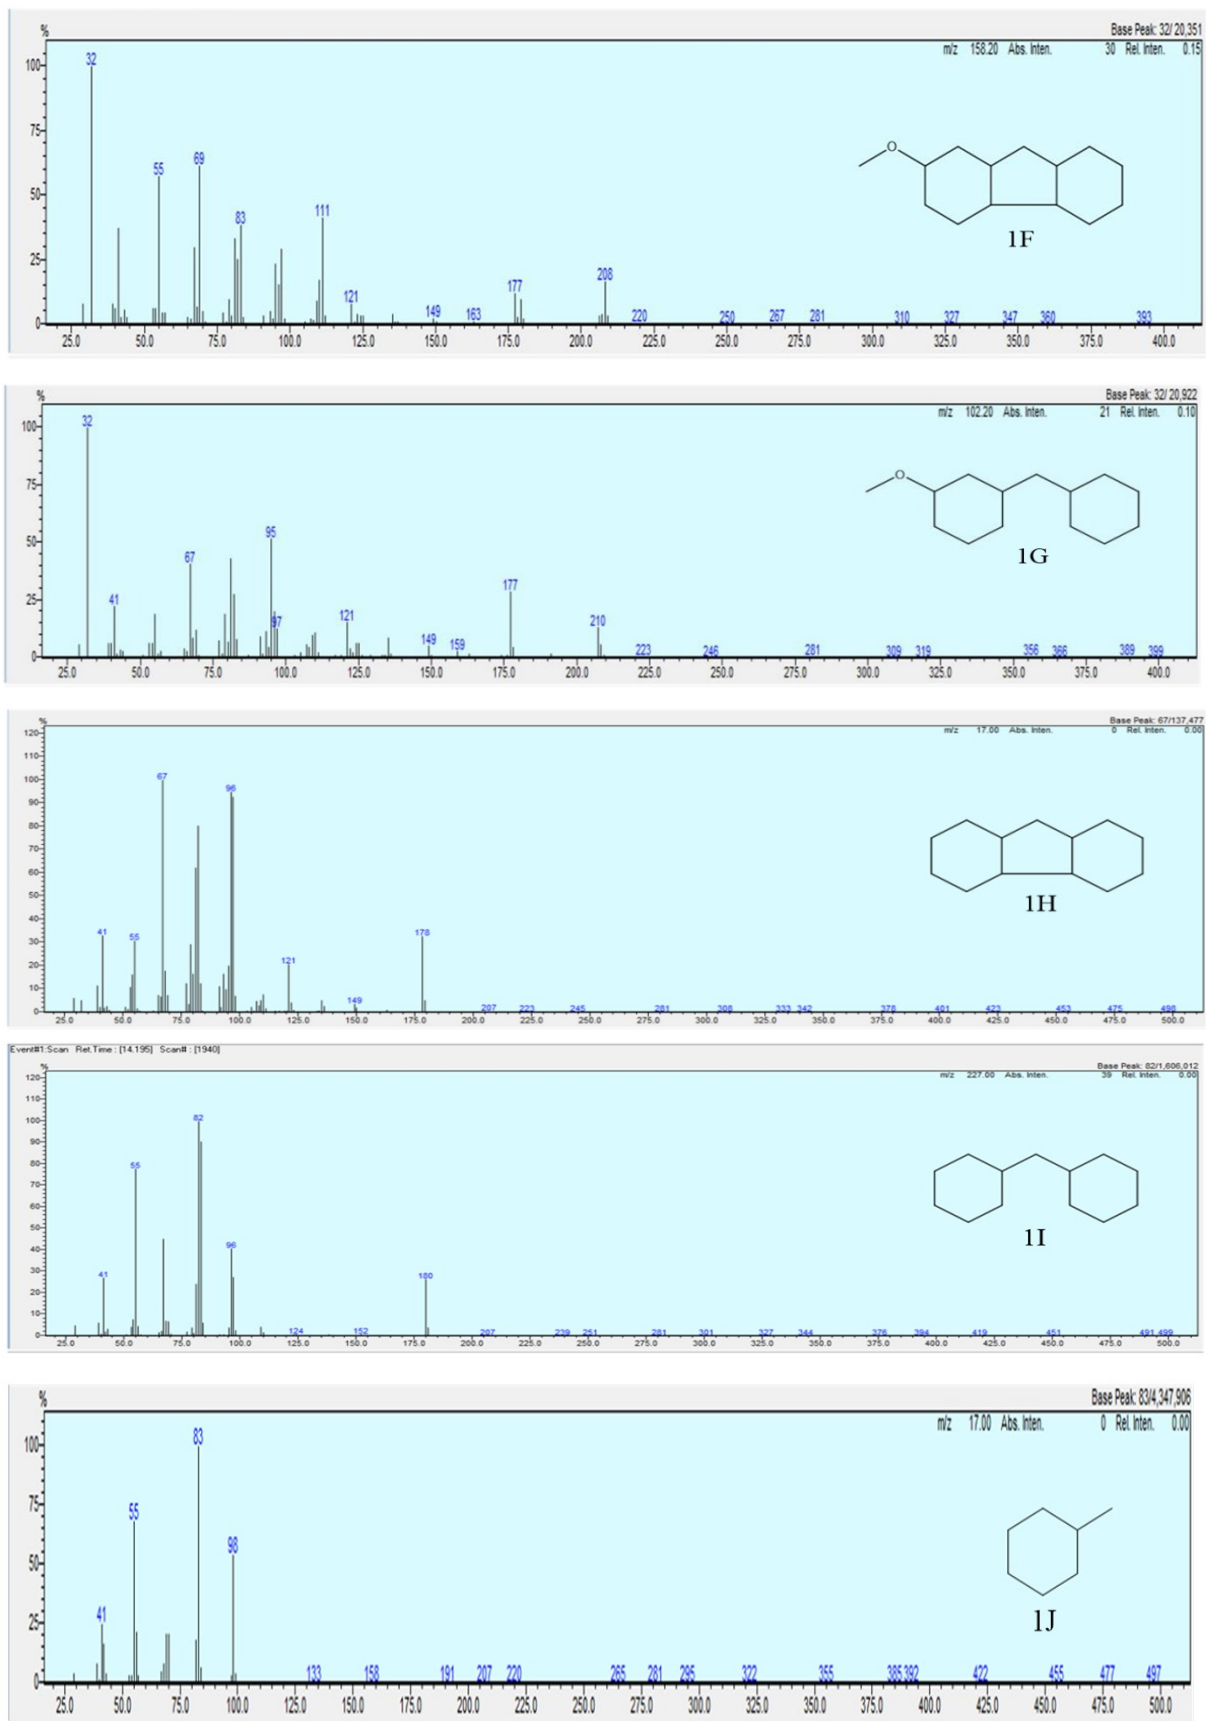

Figure S12. Mass spectrograms of 1F, 1G, 1H and 1J from the HDO of 1A.

**Table S1.** Metal dispersions and average particle sizes of the M/C catalysts measured by CO-chemisoption.

| Catalyst | Metal dispersion (%) | Particle size (nm) |
|----------|----------------------|--------------------|
| Pd/C     | 1.55                 | 64.6               |
| Ru/C     | 2.47                 | 40.4               |
| Pt/C     | 2.75                 | 36.3               |

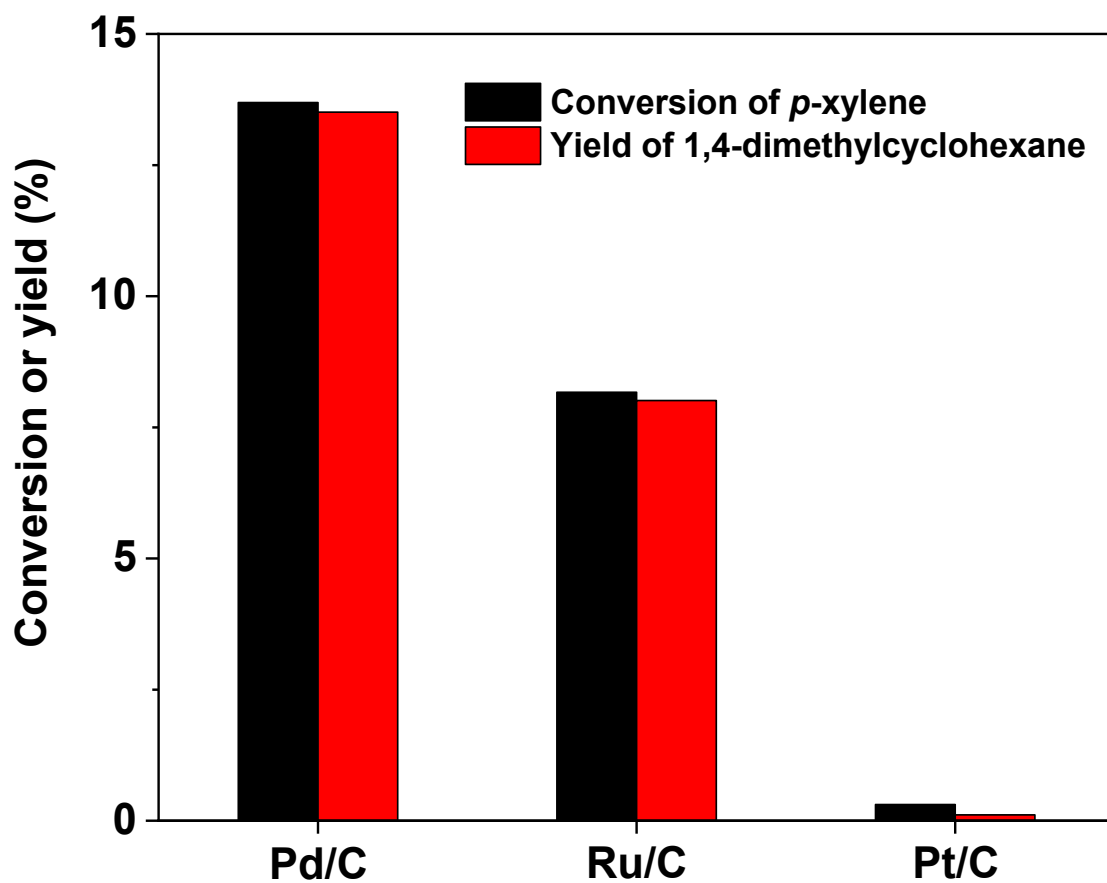

**Figure S13.** Conversion of *p*-xylene and the yield of 1,4-dimethylcyclohexane over the M/C catalyst (M = Pd, Ru, Pt). Reaction conditions: 2 MPa H<sub>2</sub>, 413 K, 0.5 h; 5 mmol *p*-xylene, 10 mL cyclohexane (used as solvent) and 0.025 g catalyst were used in each test.
